# Supplementary material
Source: PubMed Central journal article supplement (PMC546173)
Supplement: nar_33_1_e1__3.pdf [file nar_33_1_e1__3.pdf]

## Supplementary Methods

### Single strand break LM-PCR protocol for Biomek 2000

Place Plate containing DNA in 2µl at position B6 (plate 1) and plate for labeling reaction at A2 (plate 2). All master mixes are placed at chilled position A6 and all wash buffers for beads at B5.

Initial configuration – (see supplementary Fig. 1)

#### //ADJUST SAMPLE NUMBER FOR LM-PCR IN EDIT - PATTERN

Reset Tip Rack at A3 to A1 (0 tips used)\

Reset Tip Rack at B3 to A1 (0 tips used)

Reset Tip Rack at A4 to A1 (0 tips used)

Reset Tip Rack at B4 to A1 (0 tips used)

Reset Tip Rack at A5 to A1 (0 tips used)

User Function: MessageSender, Wait

#### //PRIMER EXTENSION MIX

Pipette 3.00µl from A6 to B6 (Plate 1) using P20 – P20

Pipette 15µl from A6 to B6 using p200L – P250

Gripper move A2, (Plate 2) to A1

Gripper move A1, (Plate 2) to A2

#### //PRIMER EXTENSION

User Function: MessageSender, wait

User Function: MessageSender, wait

User Function: MessageSender, wait

Gripper move B6 (Plate 1) to A1

Execute bioscript: HomePCT200

User Function: MessageSender, wait

User Function: MessageSender, wait

User Function: MessageSender, wait

Gripper move A2 (Plate 2) to B6

Gripper move A1 (Plate 1) to A2

#### //LIGATION

Pipette 7.21µl from A6 to A2 using P20 – P20

Gripper move A2 (plate 1) to A1

Execute bioscript: HomePCT200

User Function: MessageSender, wait

User Function: MessageSender, wait

User Function: MessageSender, wait

#### NOTES

- PCR lid open
- Extension master mix
- Oil
- Engaging gripper prior to hot start
- PCR lid close
- heating block
- PCR lid open
- safe positioning of gripper
- PCR lid close
- primer extension PCR
- PCR lid open
- ligation mix
- safe positioning of gripper
- PCR lid close
- ligation PCR
- PCR lid open

## //BINDING OF BEADS

Mix X $\mu$ l at A6 using P200L – P250

Pipette 12.5 $\mu$ l from A6 to A1 using P200L – P250

Pause 20 minutes

Mix 20 $\mu$ l at A1 using P200L - P250

Pause 20 minutes

Mix 20 $\mu$ l at A1 using P200L - P250

Pause 20 minutes

Gripper move A1, to A2

System pause 2.30 minutes

Pipette 60 $\mu$ l from A2 to B5 using P200L - P250

Pipette 50 $\mu$ l from B5 to A2 using P200L - P250

System pause 2.30 minutes

Pipette 60 $\mu$ l from A2 to B5 using P200L - P250

Pipette 50 $\mu$ l from B5 to A2 using P200L - P250

System pause 2.30 minutes

Pipette 60 $\mu$ l from A2 to B5 using P200L - P250

Pipette 50 $\mu$ l from B5 to A2 using P200L -P250

System pause 2.30 minutes

Pipette 60 $\mu$ l from A2 to B5 using P200L - P250

Pipette 10 $\mu$ l from B5 to A2 using P200L - P250

Pipette 15 $\mu$ l from A6 to A2 using P200L – P250

## //DENATURING

Gripper move A2 to A1

Execute bioscript: HomePCT200

User Function: MessageSender, wait

User Function: MessageSender, wait

User Function: MessageSender, wait

Gripper move B6 (plate 2) to A2

Gripper move A1 to B6

## //AMPLIFICATION

Pipette 40 $\mu$ l from A6 to B6 using P200L –P250

Gripper move A2 to A1

Gripper move A1 to A2

User Function: MessageSender, wait

User Function: MessageSender, wait

User Function: MessageSender, wait

Gripper move B6 to A1

Execute bioscript: HomePCT200

- Resuspending prewashed magnetic beads

- Add magnetic bead to sample

- suspend beads in sample

- suspend beads in sample

- to waste

- 2X binding buffer

- to waste

- 1X TE

- to waste

- 1X TE

- to waste

- 0.1X TE

- oil

- safe positioning of gripper

- PCR lid close

- denaturing PCR

- PCR lid open

- amplification master mix

- engaging gripper for hot start

- PCR lid close

- Hot start

- PCR lid open

- safe positioning of gripper

User Function: MessageSender, wait  
User Function: MessageSender, wait  
User Function: MessageSender, wait  
Gripper move A2 to A6 (Plate 2)

### //labeling

Gripper move A1 to A2  
Pipette 4µl from A6 to B6 (Plate 2) using P20 –P20  
Pipette 5µl from A2 to B6 using P20 – P20  
Pipette 15µl from A6 to B6 using P200L – P250  
Gripper move A2 to A1

Gripper move A1 to A2  
User Function: MessageSender, wait  
User Function: MessageSender, wait  
User Function: MessageSender, wait  
Gripper move B6 to A1  
Execute bioscript: HomePCT200  
User Function: MessageSender, wait  
User Function: MessageSender, wait  
User Function: MessageSender, wait

### //LABELLING REACTION CLEAN UP

Mix Xµl at A6 using P200L – P250

Pipette 10µl from A6 to A1 using P20 - P20  
Pipette 40µl from B5 to A1 using P200L – P250  
Pause system 60 seconds  
Gripper move A1 to A2  
Pause system 5.00 minutes  
Pipette 90µl from A2 to B5  
Pipette 100µl from B5 to A2  
Pause system 60 seconds  
Pipette 110µl from A2 to B5  
Pause system 10 minutes

Gripper move A2 to A1  
Pipette 40µl from A6 to A1

Pause system 5 minutes  
Gripper move A1 to A2  
Pipette 35µl from A2 to A2

- PCR lid close
- amplification PCR
- PCR lid open

- labeling master mix
- add sample from plate 1
- add oil
- engaging gripper for hot start

- PCR lid close
- Hot start
- PCR lid open
- safe positioning of gripper
- PCR lid close
- labeling PCR
- PCR lid open

- resuspending CleanSeq beads
- add CleanSeq
- add 85% ethanol
- transfer plate to magnet
- remove all liquid to waste
- wash with 85% ethanol
- remove all liquid to waste
- evaporation of residual ethanol
- resuspend CleanSeq in CEQ Sample Loading Solution
- separate beads from SLS
- move separated SLS to clean wells on plate

Gripper move A2 to A1

Execute bioscript: HomePCT200  
User Function: MessageSender, wait  
END

- store labeled reactions in dark until ready to load on CEQ
- safe positioning of gripper
- PCR lid close

## Double strand break LM-PCR protocol for Biomek 2000

Place Plate containing DNA in 5µl at position B6 (plate 1) and plate for labeling reaction at A2 (plate 2). All master mixes are placed at chilled position A6 and all wash buffers for beads at B5.

Initial configuration – (see supplementary Fig. 1)

### //ADJUST SAMPLE NUMBER FOR LM-PCR IN EDIT - PATTERN

Reset Tip Rack at A3 to A1 (0 tips used)  
Reset Tip Rack at B3 to A1 (0 tips used)  
Reset Tip Rack at A4 to A1 (0 tips used)  
Reset Tip Rack at B4 to A1 (0 tips used)  
Reset Tip Rack at A5 to A1 (0 tips used)  
User Function: MessageSender, Wait

### //PRIMER EXTENSION MIX

Pipette 25.00µl from A6 to B6 (Plate 1) using P20 – P20  
Pipette 15µl from A6 to B6 using P200L – P250  
Gripper move A2, (Plate 2) to A1  
Gripper move A1, (Plate 2) to A2

### //PRIMER EXTENSION

User Function: MessageSender, wait  
User Function: MessageSender, wait  
User Function: MessageSender, wait  
Gripper move B6 (Plate 1) to A1  
Execute bioscript: HomePCT200  
User Function: MessageSender, wait  
User Function: MessageSender, wait  
User Function: MessageSender, wait  
Gripper move A2 (Plate 2) to B6  
Gripper move A1 (Plate 1) to A2

### NOTES

- PCR lid open
- Extension master mix
- Oil
- Engaging gripper prior to hot start
- PCR lid close
- heating block
- PCR lid open
- safe positioning of gripper
- PCR lid close
- primer extension PCR
- PCR lid open

## **BINDING OF BEADS**

Mix X $\mu$ l at A6 using P200L – P250

Pipette 30 $\mu$ l from A6 to A1 using P200L – P250

Pause 20 minutes

Mix 50 $\mu$ l at A1 using P200L - P250

Pause 20 minutes

Mix 50 $\mu$ l at A1 using P200L - P250

Pause 20 minutes

Gripper move A1, to A2

System pause 2.30 minutes

Pipette 80 $\mu$ l from A2 to B5 using P200L - P250

Pipette 50 $\mu$ l from B5 to A2 using P200L - P250

System pause 2.30 minutes

Pipette 60 $\mu$ l from A2 to B5 using P200L - P250

Pipette 50 $\mu$ l from B5 to A2 using P200L - P250

System pause 2.30 minutes

Pipette 60 $\mu$ l from A2 to B5 using P200L - P250

Pipette 50 $\mu$ l from B5 to A2 using P200L -P250

System pause 2.30 minutes

Pipette 60 $\mu$ l from A2 to B5 using P200L - P250

Pipette 10 $\mu$ l from B5 to A2 using P200L - P250

Pipette 15 $\mu$ l from A6 to A2 using P200L – P250

## **//DENATURING**

Gripper move A2 to A1

Execute bioscript: HomePCT200

User Function: MessageSender, wait

User Function: MessageSender, wait

User Function: MessageSender, wait

Gripper move B6 (plate 2) to A2

Gripper move A1 to B6

## **//AMPLIFICATION**

Pipette 40 $\mu$ l from A6 to B6 using P200L –P250

Gripper move A2 to A1

Gripper move A1 to A2

User Function: MessageSender, wait

User Function: MessageSender, wait

User Function: MessageSender, wait

Gripper move B6 to A1

Execute bioscript: HomePCT200

- Resuspending prewashed magnetic beads

- Add magnetic bead to sample

- suspend beads in sample

- suspend beads in sample

- to waste

- 2X binding buffer

- to waste

- 1X TE

- to waste

- 1X TE

- to waste

- 0.1X TE

- oil

- safe positioning of gripper

- PCR lid close

- denaturing PCR

- PCR lid open

- amplification master mix

- engaging gripper for hot start

- PCR lid close

- Hot start

- PCR lid open

- safe positioning of gripper

User Function: MessageSender, wait  
User Function: MessageSender, wait  
User Function: MessageSender, wait  
Gripper move A2 to A6 (Plate 2)

### //labeling

Gripper move A1 to A2  
Pipette 4µl from A6 to B6 (Plate 2) using P20 –P20  
Pipette 5µl from A2 to B6 using P20 – P20  
Pipette 15µl from A6 to B6 using P200L – P250  
Gripper move A2 to A1

Gripper move A1 to A2  
User Function: MessageSender, wait  
User Function: MessageSender, wait  
User Function: MessageSender, wait  
Gripper move B6 to A1  
Execute bioscript: HomePCT200  
User Function: MessageSender, wait  
User Function: MessageSender, wait  
User Function: MessageSender, wait

### //LABELLING REACTION CLEAN UP

Mix Xµl at A6 using P200L – P250  
  
Pipette 10µl from A6 to A1 using P20 - P20  
Pipette 40µl from B5 to A1 using P200L – P250  
Pause system 60 seconds  
Gripper move A1 to A2  
Pause system 5.00 minutes  
Pipette 90µl from A2 to B5  
Pipette 100µl from B5 to A2  
Pause system 60 seconds  
Pipette 110µl from A2 to B5  
Pause system 10 minutes  
  
Gripper move A2 to A1  
Pipette 40µl from A6 to A1

- PCR lid close
- amplification PCR
- PCR lid open
  
- labeling master mix
- add sample from plate 1
- add oil
- engaging gripper for hot start
  
- PCR lid close
- Hot start
- PCR lid open
  
- safe positioning of gripper
- PCR lid close
- labeling PCR
- PCR lid open
  
- resuspending CleanSeq beads
- add CleanSeq
- add 85% ethanol
  
- transfer plate to magnet
  
- remove all liquid to waste
- wash with 85% ethanol
  
- remove all liquid to waste
- evaporation of residual ethanol
  
- resuspend CleanSeq in CEQ Sample Loading Solution  
(if running a control reaction labeled with a different colour, then resuspend each in 20µl and combine to run together)

Pause system 5 minutes  
Gripper move A1 to A2  
Pipette 35µl from A2 to A2

Gripper move A2 to A1

Execute bioscript: HomePCT200  
User Function: MessageSender, wait  
END

- separate beads from SLS
- move separated SLS to clean wells on plate
- store labeled reactions in dark until ready to load on CEQ
- safe positioning of gripper
- PCR lid close

## LM-PCR primer optimization protocol for Biomek 2000

Place Plate containing complete primer extension mix directly into PCR machine (plate 1) and plate for labeling reaction at A2 (plate 2). All master mixes are placed at chilled position A6 and all wash buffers for beads at B5.

Initial configuration – (see supplementary Fig. 1)

**//ADJUST SAMPLE NUMBER FOR LM-PCR IN EDIT - PATTERN**

### **//PRIMER EXTENSION**

Start PCR machine program manually

START BIOMEK program

Reset Tip Rack at A3 to A1 (0 tips used)\

Reset Tip Rack at B3 to A1 (0 tips used)

Reset Tip Rack at A4 to A1 (0 tips used)

Reset Tip Rack at B4 to A1 (0 tips used)

Reset Tip Rack at A5 to A1 (0 tips used)

Pause system 60 minutes

User Function: MessageSender, wait

Gripper move A2 (Plate 2) to B6

Gripper move A1 (Plate 1) to A2

Rest of program as in Single strand break LM-PCR protocol

### NOTES

- Biomek 2000 software can not control the temperature gradient, this must be set manually.
- Allows time for primer extension program to finish
- PCR lid open
