# Supplementary material
Source: PubMed Central journal article supplement (PMC546173)

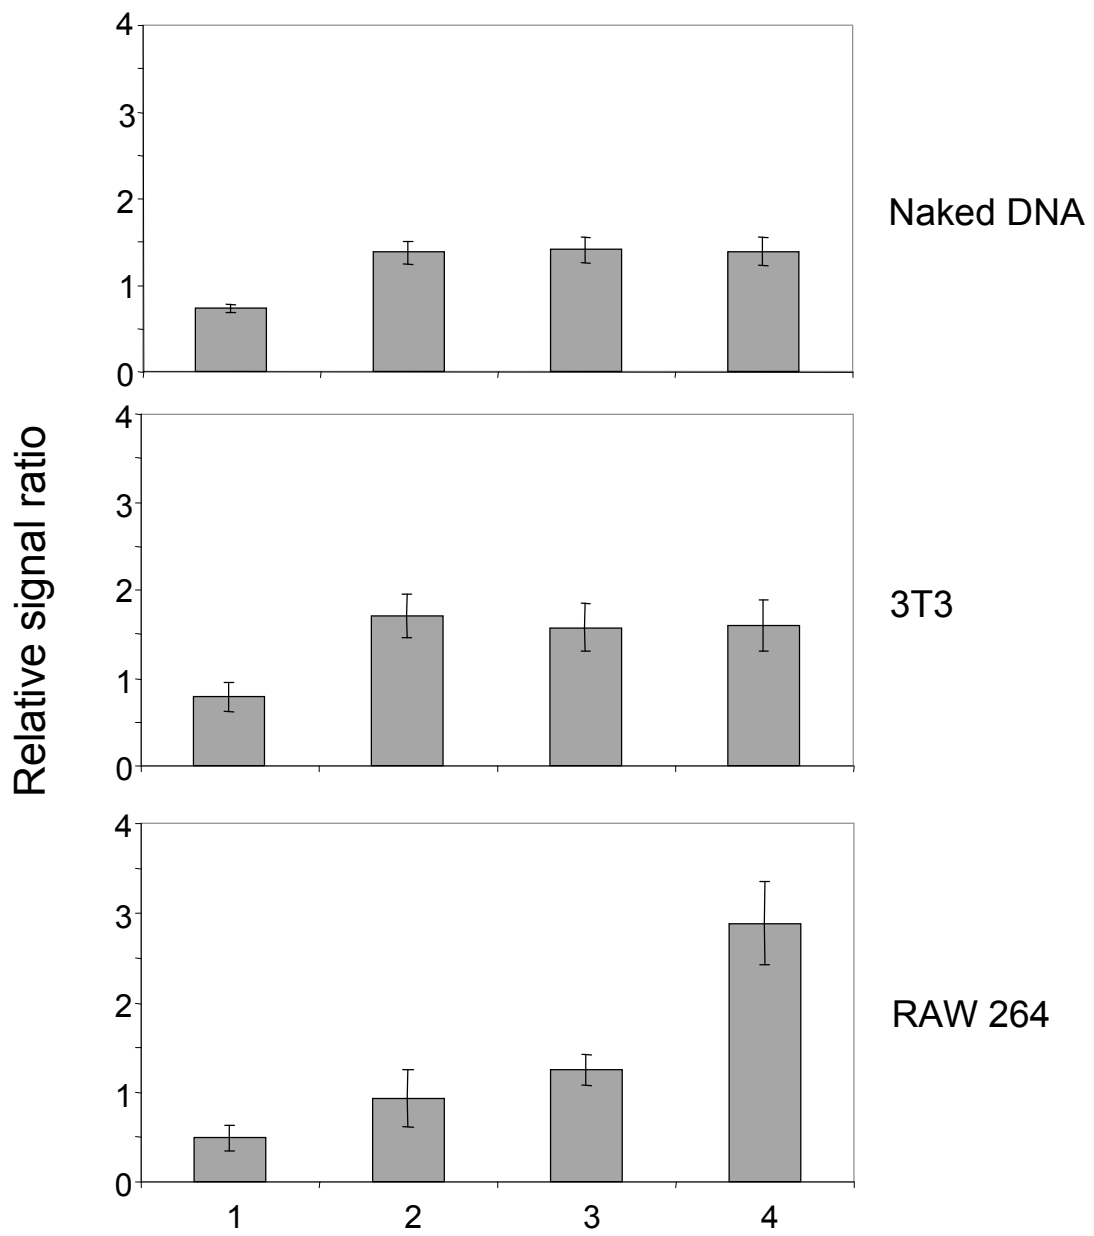

Supplement: nar_33_1_e1__1.pdf [file nar_33_1_e1__1.pdf]

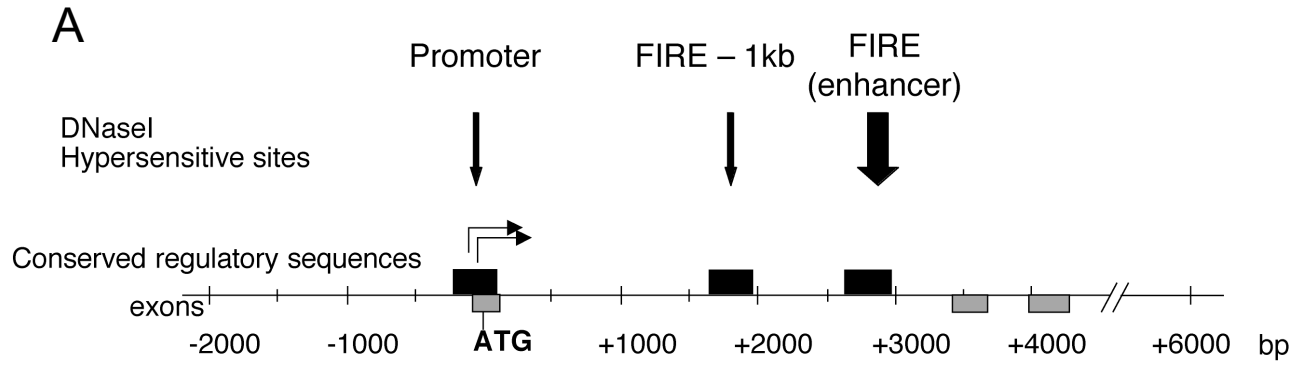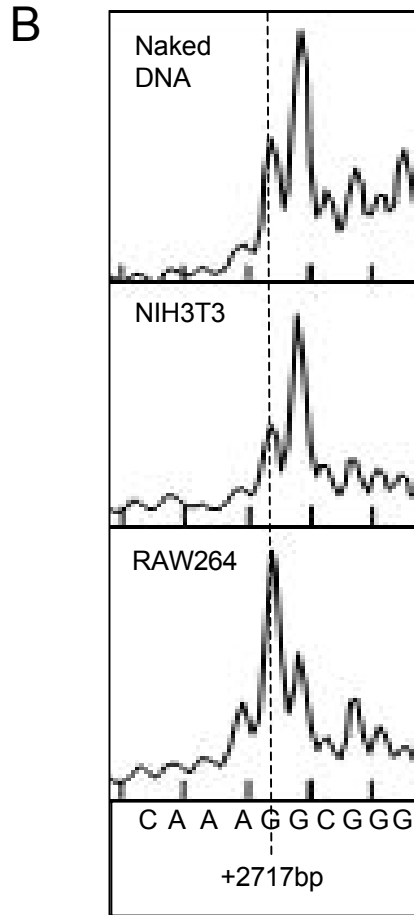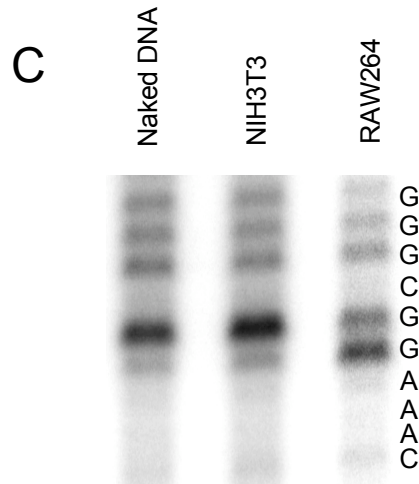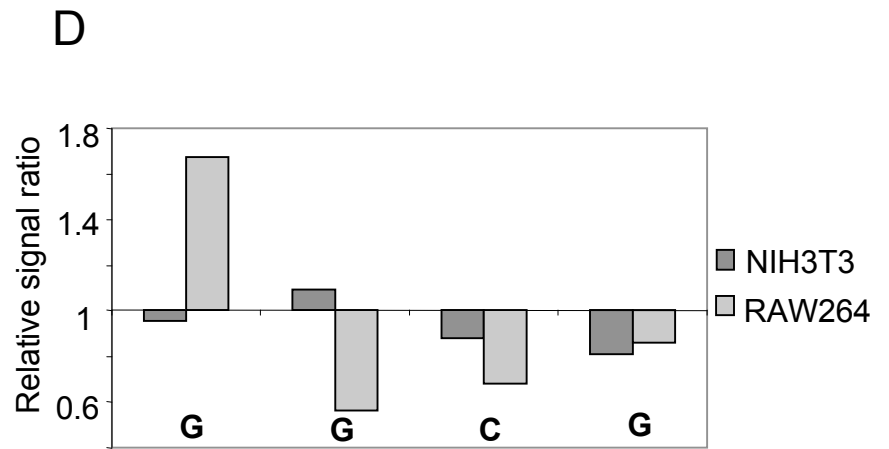

Supplement: nar_33_1_e1__2.pdf [file nar_33_1_e1__2.pdf]
